# Supplementary material for: Artificial Intelligence in Medicine: A Multinational Multi-Center Survey on the Medical and Dental Students' Perception
Source: PubMed Central journal article supplement (PMC8739771; doi:10.3389/fpubh.2021.795284), 2021-12-24
Supplement: Table_1.pdf [file Table_1.pdf]

**ADDITIONAL FILE FOR:**

# **Artificial Intelligence in Medicine: A Multinational Multi-Centre Survey on the Medical and Dental Students' Perception**

**Authors:**

Sotirios Bisdas<sup>1,2\*</sup>, Constantin-Cristian Topriceanu<sup>3\*</sup>, Zosia Zakrzewska<sup>3\*</sup>, Alexandra-Valentina Irimia<sup>4</sup>, Loizos Shakallis<sup>1</sup>, Jithu Subhash<sup>5</sup>, Maria-Madalina Casapu<sup>6</sup>, Jose Leon-Rojas<sup>7</sup>, Daniel Pinto dos Santos<sup>8</sup>, Dilys Miriam Andrews<sup>9</sup>, Claudia Zeicu<sup>10</sup>, Ahmad Mohammad Bouhuwaish<sup>11</sup>, Avinindita Nura Lestari<sup>12</sup>, Abdalkadir Abu-Ismael<sup>13</sup>, Arsal Subbah Sadiq<sup>14</sup>, Almu'atasim D'yab Khamees<sup>13</sup>, Khaled MG Mohammed<sup>15</sup>, Estelle Williams<sup>16</sup>, Aya Ibrahim Omran<sup>11</sup>, Dima Abu Ismail<sup>17</sup>, Esraa Hasan Ebrahim<sup>18</sup>

\*Joint 1<sup>st</sup> authors.

**Author Affiliations:**

1. Department of Neuroradiology, The National Hospital for Neurology and Neurosurgery, University College London NHS Foundation Trust, London, UK
2. Department of Brain Repair & Rehabilitation, Queen Square Institute of Neurology, University College London, London, UK
3. University College London Medical School, London, United Kingdom
4. Computer Science Department, University College London, London, UK
5. School of Medicine, Nottingham University, Nottingham, United Kingdom
6. Carol Davila University of Medicine and Pharmacy, Bucharest, Romania
7. International University of Ecuador, Quito, Ecuador Universidad Internacional del Ecuador, NeurALL Research Group, School of Medicine, Quito, Ecuador.
8. University of Cologne, Cologne, Germany

9. School of Medicine, Cardiff University, Cardiff, United Kingdom
10. Department of Clinical Neurophysiology, The National Hospital for Neurology and Neurosurgery, University College London NHS Foundation Trust, London, UK
11. Faculty of Medicine, University of Tobruk, Tripoli, Libya
12. Universitas Islam Bandung, Bandung, Indonesia
13. Yarmouk University, Irbid, Jordan
14. CMH Medical College Lahore, Lahore, Pakistan
15. Tanta University, Tanta, Egypt
16. Peninsula Dental School, University of Plymouth, Plymouth, United Kingdom
17. Hashemite University, Zarqua, Jordan
18. Sabha University, Sabha, Libya

**Corresponding author:**

Sotirios Bisdas

Department of Neuroradiology, 8-11 Queen Square, Box 65, London WC1N 3BG, United Kingdom

Tel: 0044 20 344 83148

Email: [s.bisdas@ucl.ac.uk](mailto:s.bisdas@ucl.ac.uk)

**Additional Table A1. Country of study for the respondents.**

| <b>Country</b> | <b>Continent</b> | <b>Number of respondents</b> |
|----------------|------------------|------------------------------|
| Albania        | Europe           | 5                            |
| Algeria        | Africa           | 18                           |
| Australia      | Australia        | 4                            |
| Bangladesh     | Asia             | 1                            |
| Belarus        | Europe           | 1                            |
| Brazil         | South America    | 5                            |
| Bulgaria       | Europe           | 2                            |
| Canada         | North America    | 3                            |
| China          | Asia             | 1                            |
| Croatia        | Europe           | 12                           |
| Cuba           | North America    | 3                            |
| Cyprus         | Europe           | 93                           |
| Czech Republic | Europe           | 1                            |
| Ecuador        | South America    | 200                          |
| Egypt          | Africa/Asia      | 156                          |
| France         | Europe           | 59                           |
| Germany        | Europe           | 50                           |
| Greece         | Europe           | 1                            |
| Grenada        | North America    | 1                            |
| Guatemala      | North America    | 1                            |
| Hong Kong      | Asia             | 1                            |
| Hungary        | Europe           | 1                            |
| India          | Asia             | 5                            |
| Indonesia      | Asia             | 288                          |
| Iraq           | Asia             | 12                           |
| Ireland        | Europe           | 12                           |
| Italy          | Europe           | 11                           |
| Jordan         | Asia             | 455                          |
| Lebanon        | Asia             | 1                            |
| Libya          | Africa           | 790                          |
| Lithuania      | Europe           | 1                            |
| Malaysia       | Asia             | 2                            |
| Malta          | Europe           | 3                            |
| Mexico         | North America    | 3                            |
| Morocco        | Africa           | 7                            |
| Myanmar        | Asia             | 3                            |
| Netherlands    | Europe           | 1                            |
| Norway         | Europe           | 2                            |
| Oman           | Asia             | 65                           |
| Pakistan       | Asia             | 160                          |
| Palestine      | Asia             | 5                            |

|              |               |     |
|--------------|---------------|-----|
| Peru         | South America | 5   |
| Poland       | Europe        | 34  |
| Qatar        | Asia          | 2   |
| Romania      | Europe        | 186 |
| Russia       | Europe/Asia   | 2   |
| Saudi Arabia | Asia          | 1   |
| Serbia       | Europe        | 7   |
| Slovakia     | Europe        | 4   |
| Slovenia     | Europe        | 1   |
| South Africa | Africa        | 46  |
| Sri Lanka    | Asia          | 1   |
| Sudan        | Africa        | 6   |
| Sweden       | Europe        | 14  |
| Syria        | Asia          | 7   |
| Tunisia      | Africa        | 2   |
| Turkey       | Asia/Europe   | 18  |
| Uganda       | Africa        | 1   |
| UK           | Europe        | 331 |
| Ukraine      | Europe        | 2   |
| USA          | North America | 4   |
| Venezuela    | South America | 7   |
| Yemen        | Asia          | 7   |

**Additional Table A2. Survey results when responses were binarized to express disagreement (strongly or somewhat disagree, not at all, to a little extent, not at all or not so aware) or agreement (somewhat or agree, to a moderate or great extent or very great extent, and somewhat or very or extremely aware).**

|                                                                                                                                                                   | p-value<br>(male vs female) | p-value<br>(tech-savvy vs<br>non-tech-savvy) | p-value<br>(dental vs medical<br>student) | p-value<br>(pre-clinical vs<br>clinical) | p-value<br>(young vs<br>mature) | p-value<br>(developed vs developing<br>country) |
|-------------------------------------------------------------------------------------------------------------------------------------------------------------------|-----------------------------|----------------------------------------------|-------------------------------------------|------------------------------------------|---------------------------------|-------------------------------------------------|
| <b>Subsection 2: Understanding on AI basic principles</b>                                                                                                         |                             |                                              |                                           |                                          |                                 |                                                 |
| Artificial intelligence is an umbrella term encompassing many technologies (e.g. 'Machine Learning'). Do you have a basic understanding of these technologies?    | <b>&lt;0.0001</b>           | <b>&lt;0.0001</b>                            | 0.962                                     | <b>0.029</b>                             | 0.547                           | 0.491*                                          |
| Currently, AI has many applications in Medicine (e.g. AI-assisted robotic surgery). How familiar are you with these applications?                                 | <b>&lt;0.0001</b>           | <b>&lt;0.0001</b>                            | 0.482                                     | <b>0.004</b>                             | 0.580                           | <b>&lt;0.0001</b>                               |
| Many applications we use in daily life already use AI (e.g. speech-/text-recognition, email spam-filters). How familiar are you with these applications?          | <b>&lt;0.0001</b>           | <b>&lt;0.0001</b>                            | 0.829                                     | 0.056*                                   | 0.348*                          | <b>0.002</b>                                    |
| <b>Subsection 3: AI as a topic in Medicine and Dentistry</b>                                                                                                      |                             |                                              |                                           |                                          |                                 |                                                 |
| AI in medical research is rapidly evolving. Healthcare AI projects attracted more investment than any AI projects in any other field globally. How aware are you? | 0.953                       | <b>&lt;0.0001</b>                            | <b>0.011</b>                              | <b>&lt;0.0001</b>                        | <b>0.023</b>                    | <b>&lt;0.0001</b>                               |
| 'Artificial Intelligence' and 'Deep Learning' are currently being broadly discussed in the medical community. How aware of this are you?                          | 0.265                       | <b>&lt;0.0001</b>                            | 0.210*                                    | <b>0.0005</b>                            | 0.213*                          | <b>&lt;0.0001</b>                               |
| To what extent do you feel you have an understanding of the technologies which underpin 'Artificial Intelligence' and 'Deep Learning'?                            | <b>&lt;0.0001</b>           | <b>&lt;0.0001</b>                            | 0.061                                     | <b>&lt;0.0001</b>                        | <b>0.016</b>                    | <b>0.001</b>                                    |
|                                                                                                                                                                   |                             |                                              |                                           |                                          |                                 |                                                 |

| <b>Subsection 4: Attitudes and feelings towards AI</b>                       |               |                   |                   |                   |               |                   |
|------------------------------------------------------------------------------|---------------|-------------------|-------------------|-------------------|---------------|-------------------|
| I perceive AI in Medicine as a partner rather than as a competitor.          | 0.500         | <b>&lt;0.0001</b> | <b>0.030</b>      | 0.371             | 0.069*        | 0.548             |
| Artificial intelligence will revolutionize Medicine/Dentistry in general.    | 0.902*        | 0.063*            | 1.00              | 1.00*             | 0.200*        | 0.081*            |
| The non-interventional physician will be replaced in the foreseeable future. | 0.355         | <b>0.011</b>      | <b>&lt;0.0001</b> | <b>0.005</b>      | <b>0.0007</b> | <b>&lt;0.0001</b> |
| In the foreseeable future, all physicians will be replaced.                  | <b>0.038*</b> | <b>0.020</b>      | 0.570             | <b>0.002</b>      | <b>0.003</b>  | <b>&lt;0.0001</b> |
| These developments frighten me.                                              | <b>0.003</b>  | <b>&lt;0.0001</b> | 0.204             | <b>&lt;0.0001</b> | <b>0.006</b>  | <b>&lt;0.0001</b> |
| These developments make Medicine in general more exciting to me.             | <b>0.010</b>  | <b>&lt;0.0001</b> | 0.529             | 0.493             | 0.421         | 0.666             |
| Artificial intelligence will never make the human physician expendable.      | 0.730         | <b>0.002</b>      | 0.423             | 0.113             | 0.531         | <b>0.007</b>      |
| Artificial intelligence will improve Medicine in general.                    | <b>0.410*</b> | <b>0.0005</b>     | 0.604             | 0.806*            | 0.471*        | <b>0.034</b>      |
| Artificial intelligence should be part of medical/dental training.           | 0.731         | <b>0.329*</b>     | 1.00              | 1.00              | 0.942         | 0.613             |

\* The sensitivity analysis yielded a p-value which has crossed either way the significance level of 0.05.

All reported analyses used Pearson's Chi-squared test with Yates' continuity correction. Significant *p*-values are highlighted in bold. For the directionality of the results please view Additional Table 3.

AI, artificial intelligence.

**Additional Table A3. Survey results when further adjustment for tech-savviness was pursued.**

|                                                                                                                                                                | Male vs Female <sup>1</sup> |                 |                      | Dental vs Medical <sup>2</sup> |                |                      | Pre-clinical vs clinical <sup>3</sup> |                 |                      | Young vs mature <sup>4</sup> |                |                      | Developed vs developing country <sup>5</sup> |                 |                      |
|----------------------------------------------------------------------------------------------------------------------------------------------------------------|-----------------------------|-----------------|----------------------|--------------------------------|----------------|----------------------|---------------------------------------|-----------------|----------------------|------------------------------|----------------|----------------------|----------------------------------------------|-----------------|----------------------|
| <b>Subsection 2: Understanding on AI basic principles</b>                                                                                                      | <b>OR (95% CI)</b>          | <b>p-value</b>  | <b>Brant p-value</b> | <b>OR (95% CI)</b>             | <b>p-value</b> | <b>Brant p-value</b> | <b>OR (95% CI)</b>                    | <b>p-value</b>  | <b>Brant p-value</b> | <b>OR (95% CI)</b>           | <b>p-value</b> | <b>Brant p-value</b> | <b>OR (95% CI)</b>                           | <b>p-value</b>  | <b>Brant p-value</b> |
| Artificial intelligence is an umbrella term encompassing many technologies (e.g. 'Machine Learning'). Do you have a basic understanding of these technologies? | 1.64<br>(1.43, 5.20)        | < <b>0.0001</b> | 0.14                 | 1.02<br>(0.87, 1.20)           | 0.768          | 0.05                 | 0.82<br>(0.72, 0.94)                  | <b>0.004</b>    | 0.09                 | 1.02<br>(0.90, 1.17)         | 0.713          | 0.12                 | 1.05<br>(0.90, 1.21)                         | 0.543*          | <b>0.01</b>          |
| Currently, AI has many applications in Medicine (e.g. AI-assisted robotic surgery). How familiar are you with these applications?                              | 1.56<br>(1.37, 1.79)        | < <b>0.0001</b> | 0.150                | 0.92<br>(0.79, 1.08)           | 0.327          | <b>0.002</b>         | 0.84<br>(0.74, 0.96)                  | <b>0.009</b>    | <b>0.003</b>         | 0.99<br>(0.88, 1.13)         | 0.906          | 0.095                | 1.33<br>(1.16, 1.54)                         | < <b>0.0001</b> | <b>0.005</b>         |
| Many applications we use in daily life already use AI (e.g. speech-/text-recognition, email spam-filters). How familiar are you with these applications?       | 1.40<br>(1.22, 1.60)        | < <b>0.0001</b> | 0.190                | 0.99<br>(0.85, 1.16)           | 0.907          | 0.323                | 0.81<br>(0.72, 0.93)                  | <b>0.002</b>    | 0.295                | 0.82<br>(0.73, 0.94)         | <b>0.003</b>   | 0.115                | 1.15<br>(0.99, 1.33)                         | 0.060*          | 0.222                |
| <b>Subsection 3: AI as a topic in Medicine and Dentistry</b>                                                                                                   |                             |                 |                      |                                |                |                      |                                       |                 |                      |                              |                |                      |                                              |                 |                      |
| AI in medical research is rapidly evolving. Healthcare AI projects attracted more investment than any AI projects in any other field                           | 1.06<br>(0.92, 1.21)        | 0.429           | 0.148                | 0.81<br>(0.69, 0.95)           | <b>0.010</b>   | 0.371                | 0.70<br>(0.59, 0.76)                  | < <b>0.0001</b> | 0.667                | 0.83<br>(0.73, 0.95)         | <b>0.005</b>   | 0.642                | 0.64<br>(0.55, 0.74)                         | < <b>0.0001</b> | <b>0.0005</b>        |

|                                                                                                                                          |                      |                   |                   |                      |                   |              |                      |                   |              |                      |               |       |                      |                   |                   |
|------------------------------------------------------------------------------------------------------------------------------------------|----------------------|-------------------|-------------------|----------------------|-------------------|--------------|----------------------|-------------------|--------------|----------------------|---------------|-------|----------------------|-------------------|-------------------|
| globally. How aware are you?                                                                                                             |                      |                   |                   |                      |                   |              |                      |                   |              |                      |               |       |                      |                   |                   |
| 'Artificial Intelligence' and 'Deep Learning' are currently being broadly discussed in the medical community. How aware of this are you? | 1.05<br>(0.91, 1.20) | 0.521             | 0.935             | 0.81<br>(0.70, 0.95) | <b>0.010</b>      | 0.962        | 0.70<br>(0.62, 0.80) | <b>&lt;0.0001</b> | 0.355        | 0.84<br>(0.74, 0.96) | <b>0.008</b>  | 0.471 | 0.75<br>(0.65, 0.87) | <b>0.0002</b>     | <b>0.005</b>      |
| To what extent do you feel you have an understanding of the technologies which underpin 'Artificial Intelligence' and 'Deep Learning'?   | 1.29<br>(1.13, 1.48) | <b>0.0003</b>     | 0.341             | 0.86<br>(0.74, 1.02) | 0.075             | <b>0.047</b> | 0.63<br>(0.55, 0.72) | <b>&lt;0.0001</b> | 0.488        | 0.86<br>(0.76, 0.98) | <b>0.022</b>  | 0.390 | 0.68<br>(0.59, 0.79) | <b>&lt;0.0001</b> | <b>0.0001</b>     |
| <b>Subsection 4:<br/>Attitudes and feelings towards AI</b>                                                                               |                      |                   |                   |                      |                   |              |                      |                   |              |                      |               |       |                      |                   |                   |
| I perceive AI in Medicine as a partner rather than as a competitor.                                                                      | 1.08<br>(0.94, 1.24) | 0.267             | 0.067             | 0.77<br>(0.65, 0.90) | <b>0.001</b>      | 0.157        | 0.89<br>(0.78, 1.02) | 0.091             | 0.336        | 0.87<br>(0.77, 0.99) | <b>0.036</b>  | 0.247 | 1.11<br>(0.96, 1.28) | 0.181             | 0.357             |
| Artificial intelligence will revolutionize Medicine/Dentistry in general.                                                                | 1.19<br>(1.03, 1.37) | <b>0.018</b>      | <b>0.043</b>      | 0.88<br>(0.75, 1.04) | 0.132             | 0.093        | 0.85<br>(0.74, 0.97) | <b>0.017</b>      | 0.138        | 0.80<br>(0.70, 0.91) | <b>0.0007</b> | 0.071 | 1.29<br>(1.11, 1.50) | <b>0.001</b>      | <b>0.042</b>      |
| The non-interventional physician will be replaced in the foreseeable future.                                                             | 1.24<br>(1.06, 1.45) | 0.579             | 0.340             | 1.42<br>(1.21, 1.66) | <b>&lt;0.0001</b> | 0.336        | 0.81<br>(0.71, 0.92) | <b>0.002</b>      | 0.292        | 0.81<br>(0.71, 0.92) | <b>0.0009</b> | 0.062 | 0.67<br>(0.58, 0.78) | <b>&lt;0.0001</b> | 0.087             |
| In the foreseeable future, all physicians will be replaced.                                                                              | 1.12<br>(0.97, 1.28) | 0.116             | 0.516             | 1.15<br>(0.98, 1.34) | 0.092             | 0.225        | 0.82<br>(0.71, 0.93) | <b>0.002</b>      | 0.228        | 0.79<br>(0.69, 0.90) | <b>0.0003</b> | 0.474 | 0.61<br>(0.53, 0.71) | <b>&lt;0.0001</b> | 0.150             |
| These developments frighten me.                                                                                                          | 0.76<br>(0.66, 0.87) | <b>&lt;0.0001</b> | <b>&lt;0.0001</b> | 0.90<br>(0.77, 1.05) | 0.178             | 0.189        | 0.67<br>(0.59, 0.76) | <b>&lt;0.0001</b> | 0.089        | 0.83<br>(0.73, 0.94) | <b>0.003</b>  | 0.044 | 0.45<br>(0.39, 0.52) | <b>&lt;0.0001</b> | <b>&lt;0.0001</b> |
| These developments make Medicine in general more exciting to me.                                                                         | 1.16<br>(1.01, 1.33) | <b>0.040</b>      | 0.262             | 0.96<br>(0.82, 1.13) | 0.622             | 0.447        | 0.91<br>(0.80, 1.04) | 0.162             | 0.199        | 0.96<br>(0.84, 1.09) | 0.538         | 0.077 | 0.93<br>(0.80, 1.08) | 0.336             | 0.668             |
| Artificial intelligence will never make the                                                                                              | 0.99<br>(0.86, 1.13) | 0.830             | 0.395             | 0.91<br>(0.78, 1.05) | 0.199             | <b>0.010</b> | 1.04<br>(0.92, 1.19) | 0.522             | <b>0.047</b> | 1.09<br>(0.96, 1.24) | 0.176         | 0.419 | 1.14<br>(0.99, 1.31) | 0.069             | 0.090             |



|                                                                    |                      |              |              |                      |              |       |                      |              |       |                      |              |       |                      |              |              |
|--------------------------------------------------------------------|----------------------|--------------|--------------|----------------------|--------------|-------|----------------------|--------------|-------|----------------------|--------------|-------|----------------------|--------------|--------------|
| human physician expendable.                                        |                      |              |              |                      |              |       |                      |              |       |                      |              |       |                      |              |              |
| Artificial intelligence will improve Medicine in general.          | 1.26<br>(1.09, 1.45) | <b>0.002</b> | 0.285        | 0.85<br>(0.72, 1.00) | <b>0.047</b> | 0.260 | 0.85<br>(0.74, 0.97) | <b>0.016</b> | 0.511 | 0.85<br>(0.74, 0.97) | <b>0.013</b> | 0.380 | 1.22<br>(1.04, 1.41) | <b>0.012</b> | 0.224        |
| Artificial intelligence should be part of medical/dental training. | 0.95<br>(0.83, 1.10) | 0.505        | <b>0.044</b> | 0.97<br>(0.82, 1.14) | 0.706        | 0.071 | 0.89<br>(0.78, 1.02) | 0.088        | 0.119 | 0.91<br>(0.80, 1.04) | 0.177        | 0.081 | 0.87<br>(0.75, 1.01) | 0.068        | <b>0.028</b> |

\* The sensitivity analysis yielded a p-value which has crossed either way the significance level of 0.05.

All reported analyses used generalized linear models with ordinal logit link (i.e., ordinal logistic regression). Significant  $p$ -values are highlighted in bold. Adjustment was made for tech-savviness.

<sup>1</sup> Males were coded as 1, while females were coded as 0.

<sup>2</sup> Dental students were coded as 1, while medical students were coded as 0.

<sup>3</sup> Clinical students were coded as 1, while pre-clinical students were coded as 0.

<sup>4</sup> Mature students were coded as 1, while young students were coded as 0.

<sup>5</sup> Students from developed countries were coded as 1, while students from developing countries were coded as 0.

**Additional Table A4. Survey results by country.**

|                                                                                                                                                                   | Strongly Disagree or equivalent | Somewhat Disagree or equivalent | Undecided or equivalent | Somewhat Agree or equivalent | Strongly Agree or equivalent |
|-------------------------------------------------------------------------------------------------------------------------------------------------------------------|---------------------------------|---------------------------------|-------------------------|------------------------------|------------------------------|
| <b>CYPRUS (n=93)</b>                                                                                                                                              |                                 |                                 |                         |                              |                              |
| <b>Understanding on AI basic principles</b>                                                                                                                       |                                 |                                 |                         |                              |                              |
| Artificial intelligence is an umbrella term encompassing many technologies (e.g., 'Machine Learning'). Do you have a basic understanding of these technologies?   | 5                               | 17                              | 42                      | 25                           | 4                            |
| Currently, AI has many applications in Medicine (e.g., AI-assisted robotic surgery). How familiar are you with these applications?                                | 12                              | 27                              | 33                      | 18                           | 3                            |
| Many applications we use in daily life already use AI (e.g. speech-/text-recognition, email spam-filters). How familiar are you with these applications?          | 4                               | 4                               | 21                      | 34                           | 30                           |
| <b>AI as a topic in Medicine and Dentistry</b>                                                                                                                    |                                 |                                 |                         |                              |                              |
| AI in medical research is rapidly evolving. Healthcare AI projects attracted more investment than any AI projects in any other field globally. How aware are you? | 8                               | 26                              | 30                      | 25                           | 4                            |

|                                                                                                                                          |    |    |    |    |    |
|------------------------------------------------------------------------------------------------------------------------------------------|----|----|----|----|----|
| 'Artificial Intelligence' and 'Deep Learning' are currently being broadly discussed in the medical community. How aware of this are you? | 5  | 30 | 30 | 22 | 6  |
| To what extent do you feel you have an understanding of the technologies which underpin 'Artificial Intelligence' and 'Deep Learning'?   | 8  | 28 | 41 | 14 | 2  |
| <b>Attitudes and feelings towards AI</b>                                                                                                 |    |    |    |    |    |
| I perceive Artificial Intelligence in Medicine as a partner rather than as a competitor.                                                 | 1  | 1  | 15 | 45 | 41 |
| Artificial intelligence will revolutionize Medicine/Dentistry in general.                                                                | 0  | 2  | 8  | 30 | 53 |
| The non-interventional physician will be replaced in the foreseeable future.                                                             | 17 | 31 | 22 | 17 | 6  |
| In the foreseeable future, all physicians will be replaced.                                                                              | 47 | 27 | 12 | 7  | 0  |
| These developments frighten me.                                                                                                          | 23 | 22 | 24 | 24 | 0  |
| These developments make Medicine in general more exciting to me.                                                                         | 1  | 9  | 20 | 44 | 19 |
| Artificial intelligence will never make the human physician expendable.                                                                  | 1  | 13 | 24 | 34 | 21 |
| Artificial intelligence will improve Medicine in general.                                                                                | 0  | 0  | 5  | 44 | 44 |
| Artificial intelligence should be part of medical/dental training.                                                                       | 0  | 1  | 10 | 30 | 52 |

## ECUADOR (N=200)

### Understanding on AI basic principles

|                                                                                                                                                                 |    |    |    |    |    |
|-----------------------------------------------------------------------------------------------------------------------------------------------------------------|----|----|----|----|----|
| Artificial intelligence is an umbrella term encompassing many technologies (e.g., 'Machine Learning'). Do you have a basic understanding of these technologies? | 15 | 56 | 83 | 40 | 6  |
| Currently, AI has many applications in Medicine (e.g., AI-assisted robotic surgery). How familiar are you with these applications?                              | 39 | 50 | 78 | 26 | 7  |
| Many applications we use in daily life already use AI (e.g. speech-/text-recognition, email spam-filters). How familiar are you with these applications?        | 5  | 17 | 51 | 76 | 51 |

### AI as a topic in Medicine and Dentistry

|                                                                                                                                                                   |    |    |    |    |    |
|-------------------------------------------------------------------------------------------------------------------------------------------------------------------|----|----|----|----|----|
| AI in medical research is rapidly evolving. Healthcare AI projects attracted more investment than any AI projects in any other field globally. How aware are you? | 18 | 44 | 67 | 49 | 22 |
| 'Artificial Intelligence' and 'Deep Learning' are currently being broadly discussed in the medical community. How aware of this are you?                          | 17 | 42 | 63 | 62 | 16 |
| To what extent do you feel you have an understanding of the technologies which                                                                                    | 26 | 52 | 81 | 32 | 9  |

|                                                                                          |    |    |    |    |     |
|------------------------------------------------------------------------------------------|----|----|----|----|-----|
| underpin 'Artificial Intelligence' and 'Deep Learning'?                                  |    |    |    |    |     |
| <b>Attitudes and feelings towards AI</b>                                                 |    |    |    |    |     |
| I perceive Artificial Intelligence in Medicine as a partner rather than as a competitor. | 2  | 10 | 46 | 77 | 65  |
| Artificial intelligence will revolutionize Medicine/Dentistry in general.                | 0  | 2  | 16 | 54 | 128 |
| The non-interventional physician will be replaced in the foreseeable future.             | 23 | 45 | 62 | 57 | 13  |
| In the foreseeable future, all physicians will be replaced.                              | 69 | 52 | 30 | 37 | 12  |
| These developments frighten me.                                                          | 39 | 57 | 38 | 51 | 15  |
| These developments make Medicine in general more exciting to me.                         | 4  | 14 | 43 | 82 | 57  |
| Artificial intelligence will never make the human physician expendable.                  | 5  | 15 | 47 | 59 | 74  |
| Artificial intelligence will improve Medicine in general.                                | 1  | 1  | 11 | 70 | 117 |
| Artificial intelligence should be part of medical/dental training.                       | 0  | 7  | 7  | 74 | 112 |
|                                                                                          |    |    |    |    |     |

## EGYPT (n=156)

### Understanding on AI basic principles

|                                                                                                                                                                 |    |    |    |    |    |
|-----------------------------------------------------------------------------------------------------------------------------------------------------------------|----|----|----|----|----|
| Artificial intelligence is an umbrella term encompassing many technologies (e.g., 'Machine Learning'). Do you have a basic understanding of these technologies? | 7  | 37 | 78 | 29 | 5  |
| Currently, AI has many applications in Medicine (e.g., AI-assisted robotic surgery). How familiar are you with these applications?                              | 30 | 54 | 55 | 15 | 2  |
| Many applications we use in daily life already use AI (e.g. speech-/text-recognition, email spam-filters). How familiar are you with these applications?        | 10 | 21 | 62 | 46 | 17 |

### AI as a topic in Medicine and Dentistry

|                                                                                                                                                                   |    |    |    |    |    |
|-------------------------------------------------------------------------------------------------------------------------------------------------------------------|----|----|----|----|----|
| AI in medical research is rapidly evolving. Healthcare AI projects attracted more investment than any AI projects in any other field globally. How aware are you? | 7  | 15 | 72 | 51 | 11 |
| 'Artificial Intelligence' and 'Deep Learning' are currently being broadly discussed in the medical community. How aware of this are you?                          | 4  | 27 | 66 | 45 | 13 |
| To what extent do you feel you have an understanding of the technologies which                                                                                    | 12 | 55 | 64 | 22 | 3  |

|                                                                                          |    |    |    |    |    |
|------------------------------------------------------------------------------------------|----|----|----|----|----|
| underpin 'Artificial Intelligence' and 'Deep Learning'?                                  |    |    |    |    |    |
| <b>Attitudes and feelings towards AI</b>                                                 |    |    |    |    |    |
| I perceive Artificial Intelligence in Medicine as a partner rather than as a competitor. | 1  | 14 | 33 | 68 | 40 |
| Artificial intelligence will revolutionize Medicine/Dentistry in general.                | 2  | 2  | 26 | 62 | 64 |
| The non-interventional physician will be replaced in the foreseeable future.             | 20 | 45 | 51 | 34 | 6  |
| In the foreseeable future, all physicians will be replaced.                              | 84 | 41 | 21 | 8  | 2  |
| These developments frighten me.                                                          | 1  | 37 | 47 | 54 | 17 |
| These developments make Medicine in general more exciting to me.                         | 2  | 19 | 31 | 84 | 20 |
| Artificial intelligence will never make the human physician expendable.                  | 11 | 28 | 39 | 36 | 42 |
| Artificial intelligence will improve Medicine in general.                                | 0  | 5  | 19 | 81 | 51 |
| Artificial intelligence should be part of medical/dental training.                       | 0  | 4  | 18 | 80 | 54 |
|                                                                                          |    |    |    |    |    |

## FRANCE (n=59)

### Understanding on AI basic principles

|                                                                                                                                                                 |   |   |    |    |    |
|-----------------------------------------------------------------------------------------------------------------------------------------------------------------|---|---|----|----|----|
| Artificial intelligence is an umbrella term encompassing many technologies (e.g., 'Machine Learning'). Do you have a basic understanding of these technologies? | 2 | 4 | 17 | 24 | 12 |
| Currently, AI has many applications in Medicine (e.g., AI-assisted robotic surgery). How familiar are you with these applications?                              | 2 | 8 | 13 | 18 | 18 |
| Many applications we use in daily life already use AI (e.g. speech-/text-recognition, email spam-filters). How familiar are you with these applications?        | 2 | 3 | 16 | 28 | 10 |

### AI as a topic in Medicine and Dentistry

|                                                                                                                                                                   |   |   |    |    |    |
|-------------------------------------------------------------------------------------------------------------------------------------------------------------------|---|---|----|----|----|
| AI in medical research is rapidly evolving. Healthcare AI projects attracted more investment than any AI projects in any other field globally. How aware are you? | 2 | 2 | 15 | 26 | 14 |
| 'Artificial Intelligence' and 'Deep Learning' are currently being broadly discussed in the medical community. How aware of this are you?                          | 2 | 7 | 15 | 22 | 13 |
| To what extent do you feel you have an understanding of the technologies which                                                                                    | 2 | 5 | 19 | 24 | 9  |



|                                                                                          |    |    |    |    |    |
|------------------------------------------------------------------------------------------|----|----|----|----|----|
| underpin 'Artificial Intelligence' and 'Deep Learning'?                                  |    |    |    |    |    |
| <b>Attitudes and feelings towards AI</b>                                                 |    |    |    |    |    |
| I perceive Artificial Intelligence in Medicine as a partner rather than as a competitor. | 0  | 1  | 9  | 28 | 21 |
| Artificial intelligence will revolutionize Medicine/Dentistry in general.                | 1  | 0  | 12 | 21 | 25 |
| The non-interventional physician will be replaced in the foreseeable future.             | 5  | 12 | 19 | 18 | 5  |
| In the foreseeable future, all physicians will be replaced.                              | 16 | 19 | 14 | 6  | 4  |
| These developments frighten me.                                                          | 11 | 16 | 13 | 11 | 8  |
| These developments make Medicine in general more exciting to me.                         | 1  | 8  | 10 | 23 | 17 |
| Artificial intelligence will never make the human physician expendable.                  | 1  | 7  | 25 | 16 | 10 |
| Artificial intelligence will improve Medicine in general.                                | 1  | 1  | 4  | 22 | 31 |
| Artificial intelligence should be part of medical/dental training.                       | 0  | 1  | 11 | 16 | 31 |
|                                                                                          |    |    |    |    |    |

## GERMANY (n=50)

### Understanding on AI basic principles

|                                                                                                                                                                 |   |    |    |    |    |
|-----------------------------------------------------------------------------------------------------------------------------------------------------------------|---|----|----|----|----|
| Artificial intelligence is an umbrella term encompassing many technologies (e.g., 'Machine Learning'). Do you have a basic understanding of these technologies? | 2 | 14 | 23 | 7  | 4  |
| Currently, AI has many applications in Medicine (e.g., AI-assisted robotic surgery). How familiar are you with these applications?                              | 6 | 18 | 15 | 4  | 7  |
| Many applications we use in daily life already use AI (e.g. speech-/text-recognition, email spam-filters). How familiar are you with these applications?        | 1 | 9  | 14 | 14 | 12 |

### AI as a topic in Medicine and Dentistry

|                                                                                                                                                                   |   |    |    |    |   |
|-------------------------------------------------------------------------------------------------------------------------------------------------------------------|---|----|----|----|---|
| AI in medical research is rapidly evolving. Healthcare AI projects attracted more investment than any AI projects in any other field globally. How aware are you? | 2 | 11 | 17 | 13 | 7 |
| 'Artificial Intelligence' and 'Deep Learning' are currently being broadly discussed in the medical community. How aware of this are you?                          | 2 | 3  | 23 | 13 | 9 |
| To what extent do you feel you have an understanding of the technologies which                                                                                    | 2 | 12 | 23 | 8  | 5 |

|                                                                                          |    |    |    |    |    |
|------------------------------------------------------------------------------------------|----|----|----|----|----|
| underpin 'Artificial Intelligence' and 'Deep Learning'?                                  |    |    |    |    |    |
| <b>Attitudes and feelings towards AI</b>                                                 |    |    |    |    |    |
| I perceive Artificial Intelligence in Medicine as a partner rather than as a competitor. | 0  | 5  | 5  | 18 | 22 |
| Artificial intelligence will revolutionize Medicine/Dentistry in general.                | 0  | 2  | 5  | 25 | 18 |
| The non-interventional physician will be replaced in the foreseeable future.             | 14 | 11 | 10 | 11 | 4  |
| In the foreseeable future, all physicians will be replaced.                              | 28 | 8  | 4  | 2  | 8  |
| These developments frighten me.                                                          | 10 | 13 | 7  | 17 | 3  |
| These developments make Medicine in general more exciting to me.                         | 0  | 6  | 10 | 24 | 10 |
| Artificial intelligence will never make the human physician expendable.                  | 1  | 4  | 7  | 18 | 20 |
| Artificial intelligence will improve Medicine in general.                                | 0  | 1  | 2  | 21 | 26 |
| Artificial intelligence should be part of medical/dental training.                       | 0  | 1  | 5  | 22 | 22 |
|                                                                                          |    |    |    |    |    |

## INDONESIA (n=288)

### Understanding on AI basic principles

|                                                                                                                                                                 |    |     |     |     |    |
|-----------------------------------------------------------------------------------------------------------------------------------------------------------------|----|-----|-----|-----|----|
| Artificial intelligence is an umbrella term encompassing many technologies (e.g., 'Machine Learning'). Do you have a basic understanding of these technologies? | 28 | 96  | 114 | 41  | 9  |
| Currently, AI has many applications in Medicine (e.g., AI-assisted robotic surgery). How familiar are you with these applications?                              | 55 | 118 | 76  | 34  | 5  |
| Many applications we use in daily life already use AI (e.g. speech-/text-recognition, email spam-filters). How familiar are you with these applications?        | 8  | 32  | 89  | 101 | 58 |

### AI as a topic in Medicine and Dentistry

|                                                                                                                                                                   |    |     |     |    |    |
|-------------------------------------------------------------------------------------------------------------------------------------------------------------------|----|-----|-----|----|----|
| AI in medical research is rapidly evolving. Healthcare AI projects attracted more investment than any AI projects in any other field globally. How aware are you? | 7  | 46  | 147 | 65 | 23 |
| 'Artificial Intelligence' and 'Deep Learning' are currently being broadly discussed in the medical community. How aware of this are you?                          | 11 | 62  | 125 | 71 | 19 |
| To what extent do you feel you have an understanding of the technologies which                                                                                    | 14 | 109 | 118 | 41 | 6  |

|                                                                                          |    |     |     |     |     |
|------------------------------------------------------------------------------------------|----|-----|-----|-----|-----|
| underpin 'Artificial Intelligence' and 'Deep Learning'?                                  |    |     |     |     |     |
| <b>Attitudes and feelings towards AI</b>                                                 |    |     |     |     |     |
| I perceive Artificial Intelligence in Medicine as a partner rather than as a competitor. | 2  | 13  | 52  | 135 | 86  |
| Artificial intelligence will revolutionize Medicine/Dentistry in general.                | 0  | 10  | 37  | 156 | 85  |
| The non-interventional physician will be replaced in the foreseeable future.             | 21 | 73  | 104 | 73  | 17  |
| In the foreseeable future, all physicians will be replaced.                              | 95 | 104 | 50  | 32  | 7   |
| These developments frighten me.                                                          | 36 | 105 | 65  | 69  | 13  |
| These developments make Medicine in general more exciting to me.                         | 0  | 15  | 52  | 146 | 75  |
| Artificial intelligence will never make the human physician expendable.                  | 9  | 58  | 87  | 95  | 39  |
| Artificial intelligence will improve Medicine in general.                                | 0  | 3   | 10  | 161 | 114 |
| Artificial intelligence should be part of medical/dental training.                       | 1  | 3   | 32  | 144 | 108 |
|                                                                                          |    |     |     |     |     |

**JORDAN (n=455)**

**Understanding on AI basic principles**

|                                                                                                                                                                 |    |     |     |     |     |
|-----------------------------------------------------------------------------------------------------------------------------------------------------------------|----|-----|-----|-----|-----|
| Artificial intelligence is an umbrella term encompassing many technologies (e.g., 'Machine Learning'). Do you have a basic understanding of these technologies? | 25 | 106 | 167 | 107 | 50  |
| Currently, AI has many applications in Medicine (e.g., AI-assisted robotic surgery). How familiar are you with these applications?                              | 51 | 103 | 143 | 108 | 50  |
| Many applications we use in daily life already use AI (e.g. speech-/text-recognition, email spam-filters). How familiar are you with these applications?        | 11 | 28  | 108 | 175 | 133 |

**AI as a topic in Medicine and Dentistry**

|                                                                                                                                                                   |    |    |     |     |    |
|-------------------------------------------------------------------------------------------------------------------------------------------------------------------|----|----|-----|-----|----|
| AI in medical research is rapidly evolving. Healthcare AI projects attracted more investment than any AI projects in any other field globally. How aware are you? | 9  | 45 | 190 | 149 | 62 |
| 'Artificial Intelligence' and 'Deep Learning' are currently being broadly discussed in the medical community. How aware of this are you?                          | 13 | 65 | 164 | 148 | 65 |
| To what extent do you feel you have an understanding of the technologies which                                                                                    | 14 | 94 | 181 | 114 | 52 |

|                                                                                          |     |     |     |     |     |
|------------------------------------------------------------------------------------------|-----|-----|-----|-----|-----|
| underpin 'Artificial Intelligence' and 'Deep Learning'?                                  |     |     |     |     |     |
| <b>Attitudes and feelings towards AI</b>                                                 |     |     |     |     |     |
| I perceive Artificial Intelligence in Medicine as a partner rather than as a competitor. | 5   | 22  | 66  | 199 | 163 |
| Artificial intelligence will revolutionize Medicine/Dentistry in general.                | 2   | 15  | 56  | 187 | 195 |
| The non-interventional physician will be replaced in the foreseeable future.             | 43  | 88  | 135 | 138 | 51  |
| In the foreseeable future, all physicians will be replaced.                              | 187 | 92  | 74  | 69  | 33  |
| These developments frighten me.                                                          | 51  | 106 | 103 | 139 | 56  |
| These developments make Medicine in general more exciting to me.                         | 10  | 39  | 77  | 185 | 144 |
| Artificial intelligence will never make the human physician expendable.                  | 18  | 65  | 100 | 138 | 134 |
| Artificial intelligence will improve Medicine in general.                                | 1   | 13  | 36  | 181 | 224 |
| Artificial intelligence should be part of medical/dental training.                       | 3   | 16  | 40  | 175 | 221 |
|                                                                                          |     |     |     |     |     |

## LIBYA (n=790)

### Understanding on AI basic principles

|                                                                                                                                                                 |     |     |     |     |    |
|-----------------------------------------------------------------------------------------------------------------------------------------------------------------|-----|-----|-----|-----|----|
| Artificial intelligence is an umbrella term encompassing many technologies (e.g., 'Machine Learning'). Do you have a basic understanding of these technologies? | 60  | 149 | 370 | 156 | 55 |
| Currently, AI has many applications in Medicine (e.g., AI-assisted robotic surgery). How familiar are you with these applications?                              | 180 | 187 | 265 | 126 | 32 |
| Many applications we use in daily life already use AI (e.g. speech-/text-recognition, email spam-filters). How familiar are you with these applications?        | 55  | 112 | 278 | 253 | 92 |

### AI as a topic in Medicine and Dentistry

|                                                                                                                                                                   |    |     |     |     |     |
|-------------------------------------------------------------------------------------------------------------------------------------------------------------------|----|-----|-----|-----|-----|
| AI in medical research is rapidly evolving. Healthcare AI projects attracted more investment than any AI projects in any other field globally. How aware are you? | 31 | 101 | 323 | 226 | 109 |
| 'Artificial Intelligence' and 'Deep Learning' are currently being broadly discussed in the medical community. How aware of this are you?                          | 38 | 130 | 344 | 184 | 94  |
| To what extent do you feel you have an understanding of the technologies which                                                                                    | 51 | 183 | 361 | 150 | 45  |



|                                                                                          |     |     |     |     |     |
|------------------------------------------------------------------------------------------|-----|-----|-----|-----|-----|
| underpin 'Artificial Intelligence' and 'Deep Learning'?                                  |     |     |     |     |     |
| <b>Attitudes and feelings towards AI</b>                                                 |     |     |     |     |     |
| I perceive Artificial Intelligence in Medicine as a partner rather than as a competitor. | 17  | 61  | 183 | 253 | 276 |
| Artificial intelligence will revolutionize Medicine/Dentistry in general.                | 6   | 50  | 105 | 311 | 318 |
| The non-interventional physician will be replaced in the foreseeable future.             | 105 | 202 | 243 | 181 | 59  |
| In the foreseeable future, all physicians will be replaced.                              | 357 | 195 | 106 | 84  | 48  |
| These developments frighten me.                                                          | 5   | 208 | 222 | 238 | 117 |
| These developments make Medicine in general more exciting to me.                         | 35  | 77  | 151 | 322 | 205 |
| Artificial intelligence will never make the human physician expendable.                  | 55  | 123 | 184 | 184 | 244 |
| Artificial intelligence will improve Medicine in general.                                | 12  | 31  | 103 | 305 | 339 |
| Artificial intelligence should be part of medical/dental training.                       | 10  | 34  | 90  | 278 | 378 |
|                                                                                          |     |     |     |     |     |

**OMAN (n=65)**

**Understanding on AI basic principles**

|                                                                                                                                                                 |   |    |    |    |   |
|-----------------------------------------------------------------------------------------------------------------------------------------------------------------|---|----|----|----|---|
| Artificial intelligence is an umbrella term encompassing many technologies (e.g., 'Machine Learning'). Do you have a basic understanding of these technologies? | 0 | 19 | 36 | 6  | 4 |
| Currently, AI has many applications in Medicine (e.g., AI-assisted robotic surgery). How familiar are you with these applications?                              | 8 | 17 | 35 | 5  | 0 |
| Many applications we use in daily life already use AI (e.g. speech-/text-recognition, email spam-filters). How familiar are you with these applications?        | 2 | 11 | 28 | 18 | 6 |

**AI as a topic in Medicine and Dentistry**

|                                                                                                                                                                   |   |    |    |    |   |
|-------------------------------------------------------------------------------------------------------------------------------------------------------------------|---|----|----|----|---|
| AI in medical research is rapidly evolving. Healthcare AI projects attracted more investment than any AI projects in any other field globally. How aware are you? | 1 | 13 | 35 | 14 | 2 |
| 'Artificial Intelligence' and 'Deep Learning' are currently being broadly discussed in the medical community. How aware of this are you?                          | 4 | 21 | 27 | 10 | 3 |
| To what extent do you feel you have an understanding of the technologies which                                                                                    | 4 | 27 | 26 | 7  | 1 |

|                                                                                          |    |    |    |    |    |
|------------------------------------------------------------------------------------------|----|----|----|----|----|
| underpin 'Artificial Intelligence' and 'Deep Learning'?                                  |    |    |    |    |    |
| <b>Attitudes and feelings towards AI</b>                                                 |    |    |    |    |    |
| I perceive Artificial Intelligence in Medicine as a partner rather than as a competitor. | 1  | 2  | 12 | 34 | 16 |
| Artificial intelligence will revolutionize Medicine/Dentistry in general.                | 1  | 3  | 17 | 16 | 28 |
| The non-interventional physician will be replaced in the foreseeable future.             | 4  | 20 | 28 | 11 | 2  |
| In the foreseeable future, all physicians will be replaced.                              | 41 | 13 | 8  | 2  | 1  |
| These developments frighten me.                                                          | 8  | 16 | 16 | 18 | 7  |
| These developments make Medicine in general more exciting to me.                         | 1  | 4  | 26 | 21 | 13 |
| Artificial intelligence will never make the human physician expendable.                  | 4  | 11 | 14 | 18 | 18 |
| Artificial intelligence will improve Medicine in general.                                | 0  | 1  | 5  | 31 | 28 |
| Artificial intelligence should be part of medical/dental training.                       | 0  | 1  | 10 | 22 | 32 |
|                                                                                          |    |    |    |    |    |

**PAKISTAN (n=160)**

**Understanding on AI basic principles**

|                                                                                                                                                                 |    |    |    |    |    |
|-----------------------------------------------------------------------------------------------------------------------------------------------------------------|----|----|----|----|----|
| Artificial intelligence is an umbrella term encompassing many technologies (e.g., 'Machine Learning'). Do you have a basic understanding of these technologies? | 7  | 46 | 70 | 31 | 6  |
| Currently, AI has many applications in Medicine (e.g., AI-assisted robotic surgery). How familiar are you with these applications?                              | 37 | 44 | 57 | 21 | 1  |
| Many applications we use in daily life already use AI (e.g. speech-/text-recognition, email spam-filters). How familiar are you with these applications?        | 10 | 27 | 51 | 47 | 25 |

**AI as a topic in Medicine and Dentistry**

|                                                                                                                                                                   |    |    |    |    |   |
|-------------------------------------------------------------------------------------------------------------------------------------------------------------------|----|----|----|----|---|
| AI in medical research is rapidly evolving. Healthcare AI projects attracted more investment than any AI projects in any other field globally. How aware are you? | 10 | 47 | 73 | 26 | 4 |
| 'Artificial Intelligence' and 'Deep Learning' are currently being broadly discussed in the medical community. How aware of this are you?                          | 9  | 51 | 72 | 23 | 5 |
| To what extent do you feel you have an understanding of the technologies which                                                                                    | 16 | 62 | 64 | 14 | 4 |

|                                                                                          |    |    |    |    |    |
|------------------------------------------------------------------------------------------|----|----|----|----|----|
| underpin 'Artificial Intelligence' and 'Deep Learning'?                                  |    |    |    |    |    |
| <b>Attitudes and feelings towards AI</b>                                                 |    |    |    |    |    |
| I perceive Artificial Intelligence in Medicine as a partner rather than as a competitor. | 2  | 11 | 41 | 77 | 29 |
| Artificial intelligence will revolutionize Medicine/Dentistry in general.                | 0  | 7  | 17 | 86 | 50 |
| The non-interventional physician will be replaced in the foreseeable future.             | 10 | 19 | 44 | 71 | 16 |
| In the foreseeable future, all physicians will be replaced.                              | 44 | 39 | 34 | 35 | 8  |
| These developments frighten me.                                                          | 20 | 34 | 48 | 46 | 12 |
| These developments make Medicine in general more exciting to me.                         | 7  | 15 | 20 | 88 | 30 |
| Artificial intelligence will never make the human physician expendable.                  | 5  | 17 | 46 | 64 | 28 |
| Artificial intelligence will improve Medicine in general.                                | 0  | 6  | 19 | 87 | 48 |
| Artificial intelligence should be part of medical/dental training.                       | 1  | 5  | 21 | 72 | 61 |
|                                                                                          |    |    |    |    |    |

## ROMANIA (n=186)

### Understanding on AI basic principles

|                                                                                                                                                                 |    |    |    |    |    |
|-----------------------------------------------------------------------------------------------------------------------------------------------------------------|----|----|----|----|----|
| Artificial intelligence is an umbrella term encompassing many technologies (e.g., 'Machine Learning'). Do you have a basic understanding of these technologies? | 7  | 47 | 83 | 36 | 13 |
| Currently, AI has many applications in Medicine (e.g., AI-assisted robotic surgery). How familiar are you with these applications?                              | 24 | 45 | 73 | 38 | 6  |
| Many applications we use in daily life already use AI (e.g. speech-/text-recognition, email spam-filters). How familiar are you with these applications?        | 5  | 20 | 63 | 62 | 36 |

### AI as a topic in Medicine and Dentistry

|                                                                                                                                                                   |    |    |    |    |    |
|-------------------------------------------------------------------------------------------------------------------------------------------------------------------|----|----|----|----|----|
| AI in medical research is rapidly evolving. Healthcare AI projects attracted more investment than any AI projects in any other field globally. How aware are you? | 7  | 25 | 86 | 55 | 13 |
| 'Artificial Intelligence' and 'Deep Learning' are currently being broadly discussed in the medical community. How aware of this are you?                          | 13 | 29 | 67 | 63 | 14 |
| To what extent do you feel you have an understanding of the technologies which                                                                                    | 11 | 45 | 80 | 43 | 7  |

|                                                                                          |    |    |    |     |    |
|------------------------------------------------------------------------------------------|----|----|----|-----|----|
| underpin 'Artificial Intelligence' and 'Deep Learning'?                                  |    |    |    |     |    |
| <b>Attitudes and feelings towards AI</b>                                                 |    |    |    |     |    |
| I perceive Artificial Intelligence in Medicine as a partner rather than as a competitor. | 2  | 8  | 42 | 61  | 73 |
| Artificial intelligence will revolutionize Medicine/Dentistry in general.                | 0  | 4  | 13 | 73  | 96 |
| The non-interventional physician will be replaced in the foreseeable future.             | 29 | 45 | 66 | 40  | 6  |
| In the foreseeable future, all physicians will be replaced.                              | 83 | 52 | 34 | 12  | 5  |
| These developments frighten me.                                                          | 38 | 58 | 43 | 35  | 12 |
| These developments make Medicine in general more exciting to me.                         | 6  | 8  | 27 | 102 | 43 |
| Artificial intelligence will never make the human physician expendable.                  | 6  | 27 | 50 | 48  | 55 |
| Artificial intelligence will improve Medicine in general.                                | 0  | 3  | 9  | 75  | 99 |
| Artificial intelligence should be part of medical/dental training.                       | 3  | 4  | 13 | 81  | 85 |
|                                                                                          |    |    |    |     |    |

## UNITED KINGDOM (n=331)

### Understanding on AI basic principles

|                                                                                                                                                                 |    |     |     |     |    |
|-----------------------------------------------------------------------------------------------------------------------------------------------------------------|----|-----|-----|-----|----|
| Artificial intelligence is an umbrella term encompassing many technologies (e.g., 'Machine Learning'). Do you have a basic understanding of these technologies? | 18 | 100 | 125 | 61  | 27 |
| Currently, AI has many applications in Medicine (e.g., AI-assisted robotic surgery). How familiar are you with these applications?                              | 44 | 96  | 126 | 48  | 17 |
| Many applications we use in daily life already use AI (e.g. speech-/text-recognition, email spam-filters). How familiar are you with these applications?        | 9  | 37  | 115 | 116 | 54 |

### AI as a topic in Medicine and Dentistry

|                                                                                                                                                                   |    |     |     |    |    |
|-------------------------------------------------------------------------------------------------------------------------------------------------------------------|----|-----|-----|----|----|
| AI in medical research is rapidly evolving. Healthcare AI projects attracted more investment than any AI projects in any other field globally. How aware are you? | 39 | 93  | 117 | 69 | 13 |
| 'Artificial Intelligence' and 'Deep Learning' are currently being broadly discussed in the medical community. How aware of this are you?                          | 34 | 93  | 114 | 70 | 20 |
| To what extent do you feel you have an understanding of the technologies which                                                                                    | 80 | 103 | 103 | 37 | 8  |



|                                                                                          |     |     |    |     |     |
|------------------------------------------------------------------------------------------|-----|-----|----|-----|-----|
| underpin 'Artificial Intelligence' and 'Deep Learning'?                                  |     |     |    |     |     |
| <b>Attitudes and feelings towards AI</b>                                                 |     |     |    |     |     |
| I perceive Artificial Intelligence in Medicine as a partner rather than as a competitor. | 6   | 30  | 64 | 114 | 117 |
| Artificial intelligence will revolutionize Medicine/Dentistry in general.                | 0   | 13  | 27 | 143 | 148 |
| The non-interventional physician will be replaced in the foreseeable future.             | 53  | 96  | 83 | 79  | 20  |
| In the foreseeable future, all physicians will be replaced.                              | 187 | 76  | 42 | 22  | 4   |
| These developments frighten me.                                                          | 79  | 101 | 62 | 71  | 18  |
| These developments make Medicine in general more exciting to me.                         | 11  | 27  | 75 | 128 | 90  |
| Artificial intelligence will never make the human physician expendable.                  | 12  | 45  | 79 | 104 | 91  |
| Artificial intelligence will improve Medicine in general.                                | 2   | 7   | 31 | 145 | 146 |
| Artificial intelligence should be part of medical/dental training.                       | 4   | 14  | 49 | 144 | 120 |

Only countries with more than 50 respondents are presented. Data is presented as counts.

AI, artificial intelligence.
